# Supplementary material for: Biochemical Diversity, Pathogenicity and Phylogenetic Analysis of Pseudomonas viridiflava from Bean and Weeds in Northern Spain
Source: MDPI journal article supplement (doi:10.3390/microorganisms10081542), 2022-07-29
Supplement: s1 [file s1]

Supplementary Material

# Biochemical diversity, pathogenicity and phylogenetic analysis of *Pseudomonas viridiflava* from bean and weeds in Northern Spain

Ana M. Fernández-Sanz, M. Rosario Rodicio and Ana J. González

Table S1. Biochemical profiles of the isolates under study

| BP | L | O | P | A | T | HL | Es | S | C | T | Ge | M | E | S | I | 36°C | AD | D-Ta | L-La | Tri | Bet | Ho | Qu | Xy | La |
|----|---|---|---|---|---|----|----|---|---|---|----|---|---|---|---|------|----|------|------|-----|-----|----|----|----|----|
| 1  | - | - | + | - | + | O  | +  | - | + | - | +  | + | + | + | + | +    | -  | -    | +    | +   | +   | -  | +  | +  | -  |
| 2  | - | - | + | - | + | O  | +  | - | + | + | +  | + | + | + | + | +    | -  | -    | +    | +   | +   | -  | +  | +  | -  |
| 3  | - | - | + | - | + | O  | +  | - | + | + | +  | + | + | + | + | +    | -  | -    | -    | +   | +   | -  | +  | +  | -  |
| 4  | - | - | + | - | + | O  | +  | - | + | + | +  | + | - | + | + | +    | -  | -    | +    | +   | +   | -  | +  | +  | -  |
| 5  | - | - | + | - | + | O  | +  | - | + | + | +  | + | + | + | + | +    | -  | +    | +    | +   | +   | -  | +  | +  | -  |
| 6  | - | - | + | - | + | O  | +  | - | + | + | +  | + | + | + | + | +    | -  | -    | +    | +   | +   | +  | +  | +  | -  |
| 7  | - | - | + | - | + | O  | +  | - | + | - | +  | + | + | + | + | +    | -  | +    | +    | -   | +   | -  | +  | +  | -  |
| 8  | - | - | + | - | + | O  | +  | - | + | - | +  | + | + | + | + | +    | +  | +    | +    | +   | +   | -  | +  | +  | -  |
| 9  | - | - | + | - | + | O  | +  | - | + | - | -  | + | + | + | + | +    | -  | +    | -    | +   | -   | -  | +  | +  | -  |
| 10 | - | - | + | - | + | O  | +  | - | - | + | -  | + | + | + | + | +    | -  | +    | +    | +   | +   | -  | +  | +  | -  |
| 11 | - | - | + | - | + | O  | +  | - | - | + | -  | + | + | + | + | +    | -  | -    | -    | +   | +   | -  | +  | +  | -  |
| 12 | - | - | - | - | + | O  | +  | - | + | + | +  | + | + | + | + | +    | -  | -    | +    | +   | +   | -  | +  | +  | -  |
| 13 | - | - | - | - | + | O  | +  | - | - | - | -  | + | + | + | + | +    | -  | -    | +    | +   | +   | -  | +  | +  | -  |
| 14 | + | - | + | - | + | O  | +  | - | + | - | +  | + | + | + | + | +    | -  | -    | +    | +   | +   | -  | +  | +  | -  |
| 15 | + | - | + | - | + | O  | +  | - | + | - | +  | + | + | + | + | +    | -  | +    | +    | +   | +   | -  | +  | +  | -  |
| 16 | + | - | - | - | + | O  | +  | - | + | - | +  | + | + | + | + | +    | -  | -    | +    | +   | +   | -  | +  | +  | -  |
| 17 | + | - | + | - | + | O  | +  | - | + | + | +  | + | + | + | + | +    | -  | -    | +    | +   | +   | -  | +  | +  | -  |
| 18 | + | - | + | - | + | O  | +  | - | + | + | +  | + | + | + | + | +    | -  | -    | +    | +   | -   | -  | +  | +  | -  |
| 19 | + | - | + | - | + | O  | +  | - | + | + | +  | + | + | + | + | -    | -  | -    | +    | +   | -   | -  | +  | +  | -  |
| 20 | + | - | + | - | + | O  | +  | - | + | + | +  | + | + | + | + | +    | -  | -    | -    | +   | +   | -  | +  | +  | -  |
| 21 | + | - | + | - | + | O  | +  | - | + | + | +  | + | + | + | + | +    | -  | +    | +    | +   | +   | -  | +  | +  | -  |
| 22 | + | - | + | - | + | O  | +  | - | + | + | +  | + | - | + | + | +    | -  | +    | +    | +   | +   | -  | +  | +  | -  |
| 23 | + | - | + | - | + | O  | +  | - | + | + | +  | + | - | + | + | +    | -  | -    | -    | +   | +   | -  | +  | +  | -  |
| 24 | + | - | + | - | + | O  | +  | - | + | + | +  | + | - | + | + | +    | -  | -    | +    | +   | +   | -  | +  | +  | -  |
| 25 | + | - | + | - | + | O  | +  | - | + | - | +  | + | + | + | + | +    | -  | -    | -    | +   | +   | -  | +  | +  | -  |
| 26 | + | - | + | - | + | O  | +  | - | + | - | +  | + | + | + | + | +    | -  | -    | -    | +   | -   | -  | +  | +  | -  |

|    |   |   |   |   |   |   |   |   |   |   |   |   |   |   |   |   |   |   |   |   |   |   |   |   |
|----|---|---|---|---|---|---|---|---|---|---|---|---|---|---|---|---|---|---|---|---|---|---|---|---|
| 27 | + | - | + | - | + | O | + | - | + | - | + | + | + | + | + | + | - | - | + | + | - | + | + | - |
| 28 | + | - | + | - | + | O | + | - | + | - | + | + | + | + | + | + | - | + | + | - | - | + | + | - |
| 29 | + | - | + | - | + | O | + | - | + | - | + | - | + | - | - | + | - | - | + | + | + | - | + | - |
| 30 | + | - | - | - | + | O | + | - | + | + | + | + | + | + | + | + | - | - | - | + | + | - | + | - |
| 31 | + | - | - | - | + | O | + | - | + | + | + | + | + | + | + | + | - | + | + | + | + | - | + | - |
| 32 | + | - | - | - | + | O | + | - | + | - | + | + | + | + | + | + | - | + | + | + | + | - | + | - |
| 33 | + | - | - | - | + | O | + | - | + | - | + | + | + | + | + | + | - | + | - | + | + | - | + | - |

L, levane; O, oxidase; P, potato slice pectinolysis; A, arginine; T, tobacco hypersensitivity; HL, glucose oxidation/fermentation; Es, esculine; S, sucrose; C, caseine; T, tween80; Ge, gelatine; M, mannitol; E, erythritol; S, sorbitol, I; inositol; 36°C, growth at this temperature; Ad, adonitol; D-Ta, D-tartrate; L-La, L-lactate; Tri, trigonelline; Bet, betaine; Ho, homoserine; Qu, quinate; Xy, xylose, La, lactose; +, positive, -, negative, O, oxidative

Table S2. Accession numbers of the sequences used for phylogenetic analysis

47

|    |           |             |             |             |
|----|-----------|-------------|-------------|-------------|
| 48 |           |             |             |             |
|    | ISOLATE   | <i>gyrB</i> | <i>rpoD</i> | <i>gltA</i> |
| 49 | LPPA 511  | MT683648    | MT709129    | ON838913    |
| 50 | LPPA 574  | MT683625    | MT709110    | ON838894    |
|    | LPPA 513  | MT683649    | MT709130    | ON838914    |
| 51 | LPPA 1598 | MT683643    | MT709125    | ON838909    |
| 52 | LPPA 1600 | MT683644    | MT709126    | ON838910    |
|    | LPPA 1604 | MT683645    | MT709127    | ON838911    |
| 53 | LPPA 593  | MT683626    | MT709111    | ON838895    |
|    | LPPA 842  | MT683633    | MT709118    | ON838902    |
| 54 | LPPA 599  | MT683650    | MT709131    | ON838915    |
| 55 | LPPA 820  | MT683631    | MT709116    | ON838900    |
| 56 | LPPA 806  | MT683627    | MT709112    | ON838896    |
| 57 | LPPA 824  | MT683632    | MT709117    | ON838901    |
| 58 | LPPA 811  | MT683628    | MT709113    | ON838897    |
| 59 | LPPA 813  | MT683629    | MT709114    | ON838898    |
| 60 | LPPA 814  | MT683630    | MT709115    | ON838899    |
| 61 | LPPA 827  | MT683651    | MT709132    | ON838916    |
| 62 | LPPA 846  | MT683634    | MT709119    | ON838903    |
| 63 | LPPA 1420 | MT683659    | MT709138    | ON838922    |
| 64 | LPPA 888  | MT683635    | MT709120    | ON838904    |
| 65 | LPPA 894  | MT683637    | MT709121    | ON838905    |
| 66 | LPPA 896  | MT683652    | MT709133    | ON838917    |
| 67 | LPPA 897  | MT683653    | MT709134    | ON838918    |
|    | LPPA 1674 | MT683669    | MT709147    | ON838931    |
|    | LPPA 1679 | MT683647    | MT709128    | ON838912    |
|    | LPPA 934  | MT683638    | MT709122    | ON838906    |
|    | LPPA 937  | MT683640    | MT709123    | ON838907    |
|    | LPPA 1421 | MT683660    | MT709139    | ON838923    |
|    | LPPA 1666 | MT683668    | MT709146    | ON838930    |
|    | LPPA 1682 | MT683672    | MT709148    | ON838932    |
|    | LPPA 941  | MT683642    | MT709124    | ON838908    |
|    | LPPA 1385 | MT683654    | MT709135    | ON838919    |
|    | LPPA 1391 | MT683655    | MT709136    | ON838920    |
|    | LPPA 1393 | MT683656    | MT709137    | ON838921    |
|    | LPPA 1432 | MT683661    | MT709140    | ON838924    |
|    | LPPA 1446 | MT683662    | MT709141    | ON838925    |
|    | LPPA 1451 | MT683663    | MT709142    | ON838926    |
|    | LPPA 1452 | MT683664    | MT709143    | ON838927    |
|    | LPPA 1454 | MT683665    | MT709144    | ON838928    |
|    | LPPA 1467 | MT683666    | MT709145    | ON838929    |
